# Supplementary material for: New phosphorescent platinum(ii) complexes with tetradentate C*N^N*C ligands: liquid crystallinity and polarized emission
Source: Royal Society of Chemistry journal article supplement (doi:10.1039/c6dt04502b), 2016-12-15

# New phosphorescent platinum(II) complexes with tetradentate C\*N^N\*C ligands: liquid crystallinity and polarized emission

Shilin Zhang,<sup>a</sup> Kaijun Luo,<sup>\*a</sup> Hao Geng,<sup>a</sup> Hailiang Ni,<sup>a</sup> Haifeng Wang<sup>a</sup> and

Quan Li<sup>\*a</sup>

College of Chemistry and Materials Science, Sichuan Normal University,

5 Jingan Road, Chengdu 610068 China

## Electronic Supporting Information (ESI)

**Table S1** Crystal data and structure refinement for Pt-L<sup>12</sup>.

|                                    | Pt-L <sup>12</sup>                                               |
|------------------------------------|------------------------------------------------------------------|
| Empirical formula                  | C <sub>46</sub> H <sub>62</sub> N <sub>2</sub> O <sub>4</sub> Pt |
| Formula weight                     | 902.06                                                           |
| Temperature/K                      | 293.1(2)                                                         |
| Crystal system                     | triclinic                                                        |
| Space group                        | P-1                                                              |
| a/Å                                | 8.0093(2)                                                        |
| b/Å                                | 9.9381(4)                                                        |
| c/Å                                | 27.1665(9)                                                       |
| α/°                                | 84.786(3)                                                        |
| β/°                                | 86.532(3)                                                        |
| γ/°                                | 70.962(3)                                                        |
| Volume/Å <sup>3</sup>              | 2034.55(13)                                                      |
| Z                                  | 2                                                                |
| ρ <sub>calc</sub> /cm <sup>3</sup> | 1.472                                                            |
| μ/mm <sup>-1</sup>                 | 3.493                                                            |
| F(000)                             | 924                                                              |
| Crystal size/mm <sup>3</sup>       | 0.7 × 0.4 × 0.05                                                 |

|                                                  |                                                                  |
|--------------------------------------------------|------------------------------------------------------------------|
| Radiation                                        | MoK $\alpha$ ( $\lambda = 0.71073$ )                             |
| 2 $\theta$ range for data collection/ $^{\circ}$ | 6.702 to 50.7                                                    |
| Index ranges                                     | $-9 \leq h \leq 9$ , $-11 \leq k \leq 11$ , $-32 \leq l \leq 32$ |
| Reflections collected                            | 25032                                                            |
| Independent reflections                          | 7441 [ $R_{\text{int}} = 0.0509$ , $R_{\text{sigma}} = 0.0472$ ] |
| Data/restraints/parameters                       | 7441/0/480                                                       |
| Goodness-of-fit on $F^2$                         | 1.056                                                            |
| Final R indexes [ $I > 2\sigma(I)$ ]             | $R_1 = 0.0302$ , $wR_2 = 0.0697$                                 |
| Final R indexes [all data]                       | $R_1 = 0.0344$ , $wR_2 = 0.0726$                                 |
| Largest diff. peak/hole / $e \text{ \AA}^{-3}$   | 0.73/-1.96                                                       |

**Table S2.** Solvatochromic Data for **Pt-L<sup>16</sup>**.

| Solvent      | Absorption bands (nm) | Emission (nm) |
|--------------|-----------------------|---------------|
| Toluene      | 440, 508              | 624           |
| THF          | 430, 494              | 622           |
| DMF          | 416, 474              | 619           |
| Benzonitrile | 415, 472              | 618           |

**Table S3** Selected calculated excitation energies ( $\Delta E$ ), oscillator strengths ( $f$ ), main orbital components, and Assignment for **Pt-L<sup>16</sup>**, **Pt-L<sup>12</sup>** and **Pt-L<sup>6</sup>** in dichloromethane.

|                          | $\lambda_{\text{exc}}$ (calc.)/nm | $\Delta E$ /eV | $f$    | Transition (Percentage Contribution)           | Assignment     |
|--------------------------|-----------------------------------|----------------|--------|------------------------------------------------|----------------|
| <b>Pt-L<sup>16</sup></b> | 542.5                             | 2.29           | 0.0518 | H-0->L+0(+98%)                                 | MLCT/ILCT      |
|                          | 436.7                             | 2.84           | 0.0443 | H-1->L+0(+70%), H-3->L+0(+27%)                 | MLCT/ILCT      |
|                          | 423.6                             | 2.93           | 0.0513 | H-3->L+0(+53%), H-1->L+0(+25%), H-2->L+0(+22%) | MLCT/ILCT      |
|                          | 401.4                             | 3.09           | 0.0137 | H-2->L+0(+75%), H-3->L+0(+19%)                 | MLCT/ILCT      |
|                          | 354.7                             | 3.50           | 0.0173 | H-0->L+1(+89%), H-4->L+0(+7%)                  | MLCT/ILCT      |
|                          | 351.5                             | 3.53           | 0.0801 | H-4->L+0(+88%), H-0->L+1(+6%)                  | MLCT/ILCT      |
| <b>Pt-L<sup>12</sup></b> | 549.5                             | 2.26           | 0.0527 | H-0->L+0(+98%)                                 | MLCT/ILCT      |
|                          | 438.0                             | 2.83           | 0.0276 | H-1->L+0(+53%), H-3->L+0(+41%), H-2->L+0(5%)   | MLCT/ILCT      |
|                          | 426.9                             | 2.90           | 0.0624 | H-1->L+0(+42%), H-3->L+0(31%), H-2->L+0(+26%)  | MLCT/ILCT      |
|                          | 403.5                             | 3.07           | 0.0231 | H-2->L+0(+66%), H-3->L+0(+27%)                 | MLCT/ILCT      |
|                          | 360.0                             | 3.44           | 0.0148 | H-0->L+1(+94%)                                 | MLCT/ILCT      |
|                          | 354.1                             | 3.50           | 0.0123 | H-0->L+2(+84%), H-4->L+0(+10%)                 | MLCT/ILCT      |
|                          | 352.0                             | 3.52           | 0.0897 | H-4->L+0(+83%), H-0->L+2(11%)                  | MLCT/ILCT      |
|                          | <b>Pt-L<sup>6</sup></b>           | 536.4          | 2.31   | 0.0549                                         | H-0->L+0(+98%) |
| 439.3                    |                                   | 2.82           | 0.0207 | H-1->L+0(+54%), H-3->L+0(+45%)                 | MLCT/ILCT      |
| 423.9                    |                                   | 2.93           | 0.0845 | H-3->L+0(+36%), H-2->L+0(+34%), H-1->L+0(+29%) | MLCT/ILCT      |
| 414.9                    |                                   | 2.99           | 0.0110 | H-2->L+0(+63%), H-3->L+0(+18%), H-1->L+0(+16%) | MLCT/ILCT      |
| 355.2                    |                                   | 3.49           | 0.0653 | H-4->L+0(+65%), H-0->L+1(+27%)                 | MLCT/ILCT      |
| 353.1                    |                                   | 3.51           | 0.0133 | H-0->L+1(+67%), H-4->L+0(+29%)                 | MLCT/ILCT      |

**Table S4** Selected bond lengths (Å) and angles (deg) for **Pt-L<sup>16</sup>** from X-ray and TD-DFT calculations.

|                       | X-ray     | TD-DFT calculation |
|-----------------------|-----------|--------------------|
| Pt(01)-C(008)         | 2.005(4)  | 2.016              |
| Pt(01)-C(00A)         | 1.999(4)  | 2.015              |
| Pt(01)-N(003)         | 2.053(3)  | 2.103              |
| Pt(01)-N(002)         | 2.058(3)  | 2.103              |
| C(00A)-Pt(01)-C(008)  | 97.95(15) | 98.96              |
| N(003)-Pt(01)-N(002)  | 79.59(12) | 78.63              |
| C(00A)-Pt(01)- N(002) | 91.60(13) | 92.18              |
| C(008)-Pt(01)- N(003) | 92.33(14) | 92.07              |

**Table S5** Thermal behavior for the new platinum(II) complexes.

| Complex                  | Phase transition <sup>a</sup> /°C |                 |                 | Enthalpy changes                     |
|--------------------------|-----------------------------------|-----------------|-----------------|--------------------------------------|
|                          |                                   |                 |                 | ( $\Delta H$ /kJ mol <sup>-1</sup> ) |
| <b>Pt-L<sup>16</sup></b> | Cr <sub>1</sub>                   | 64              | Cr <sub>2</sub> | 6.5                                  |
|                          | Cr <sub>2</sub>                   | 130             | Iso             | 10.1                                 |
|                          | Iso                               | 116             | S <sub>m</sub>  | 11.5                                 |
|                          | S <sub>m</sub>                    | 57              | Cr              | 8.1                                  |
| <b>Pt-L<sup>12</sup></b> | Cr <sub>1</sub>                   | 58              | Cr <sub>2</sub> | 5.4                                  |
|                          | Cr <sub>2</sub>                   | 93              | Cr <sub>3</sub> | 1.1                                  |
|                          | Cr <sub>3</sub>                   | 120             | Cr <sub>4</sub> | 3.0                                  |
|                          | Cr <sub>4</sub>                   | 144             | Iso             | 12.7                                 |
|                          | Iso                               | 127             | S <sub>m</sub>  | 10.2                                 |
|                          | S <sub>m</sub>                    | 108             | Cr <sub>4</sub> | 3.5                                  |
|                          | Cr <sub>4</sub>                   | 52              | Cr <sub>3</sub> | 15.0                                 |
| <b>Pt-L<sup>6</sup></b>  | Cr <sub>3</sub>                   | 25              | Cr <sub>1</sub> |                                      |
|                          | Cr <sub>1</sub>                   | 35              | Cr <sub>2</sub> | 3.0                                  |
|                          | Cr <sub>2</sub>                   | 190             | Iso             | 19.7                                 |
|                          | Iso                               | 155             | Cr <sub>2</sub> | 18.9                                 |
| Cr <sub>2</sub>          | 153                               | Cr <sub>1</sub> | 2.0             |                                      |

<sup>a</sup> Transition temperatures and enthalpy values are taken from the second DSC cycle starting from the crystal (10°C min<sup>-1</sup>). Cr<sub>1</sub>, Cr<sub>2</sub>, Cr<sub>3</sub>, Cr<sub>4</sub> = crystalline phase, Iso = isotropic liquid phase, S<sub>m</sub> = smectic phase.

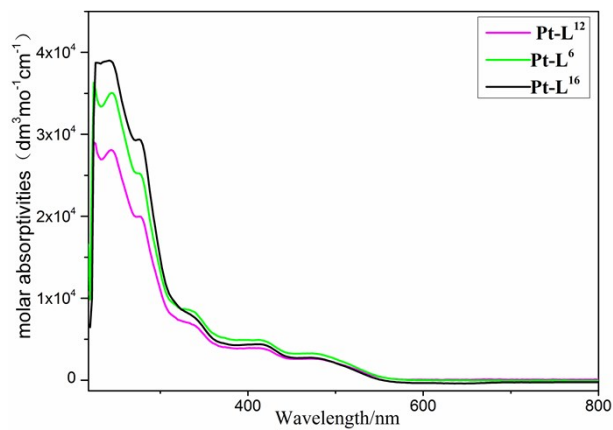

**Fig. S1** UV-visible absorption of three platinum complexes in  $\text{CH}_2\text{Cl}_2$  ( $\approx 1.2 \times 10^{-5} \text{ mol dm}^{-3}$ ) at 298 K ( $\lambda_{\text{ex}} = 412 \text{ nm}$ ).

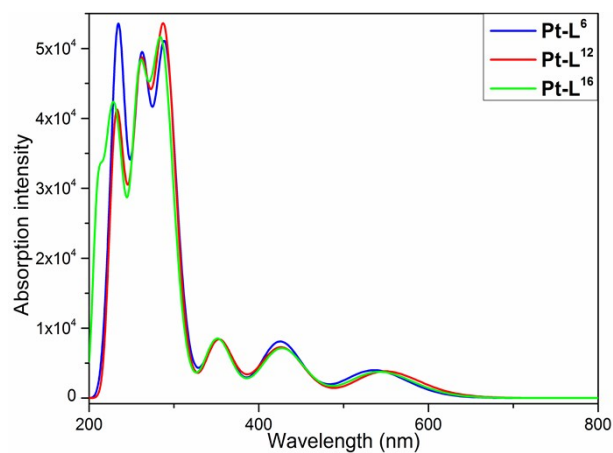

**Fig. S2** Absorption spectra of  $\text{Pt-L}^{12}$  calculated at their optimized  $S_0$  geometry in  $\text{CH}_2\text{Cl}_2$  solution by TD-DFT.

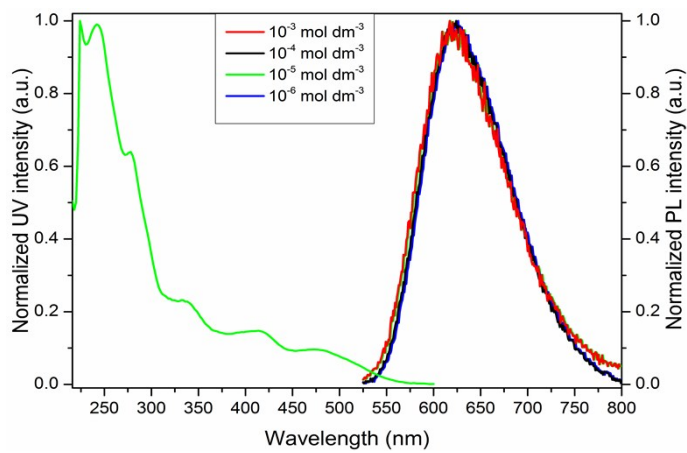

**Fig. S3** Emission spectra of  $\text{Pt-L}^{16}$  in different concentrations in  $\text{CH}_2\text{Cl}_2$  at 298 K ( $\lambda_{\text{ex}} = 412 \text{ nm}$ ).

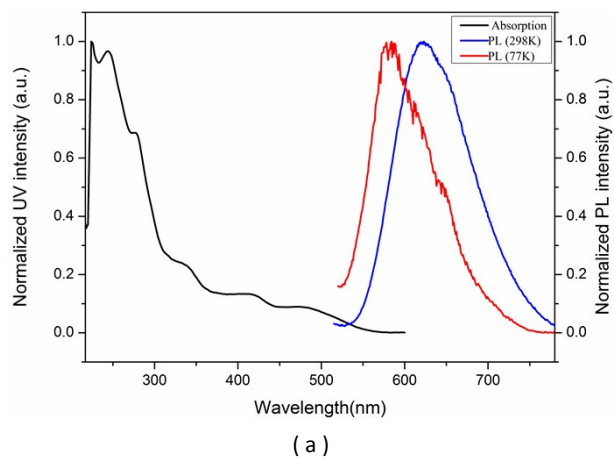

( a )

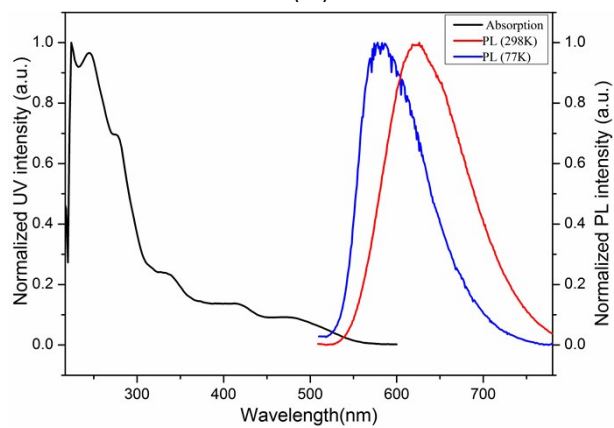

( b )

**Fig. S4** UV-visible absorption and emission spectra of **Pt-L<sup>12</sup>** ( a ) and **Pt-L<sup>6</sup>** ( b ) in  $\text{CH}_2\text{Cl}_2$  ( $\approx 1.2 \times 10^{-5}$  mol  $\text{dm}^{-3}$ ) at 298 K and 77 K (  $\lambda_{\text{ex}} = 412$  nm)

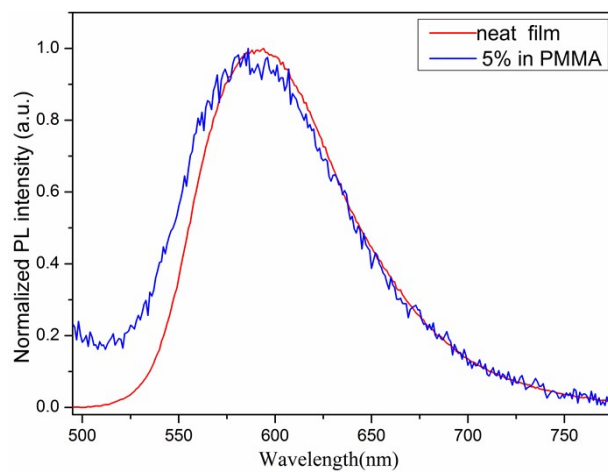

( a )

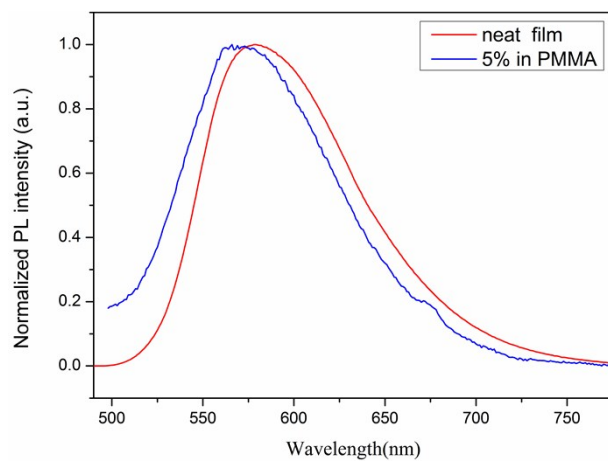

( b )

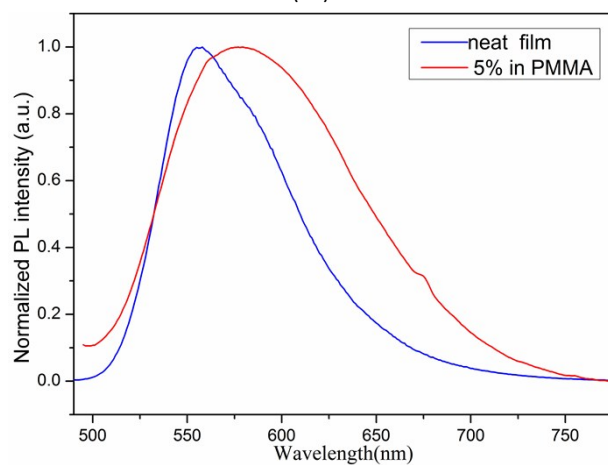

( c )

**Fig. S5** Emission spectra of **Pt-L<sup>16</sup>** ( a ), **Pt-L<sup>12</sup>** ( b ), and **Pt-L<sup>6</sup>** ( c ) in neat film and a doped PMMA film at 298 K ( $\lambda_{\text{ex}} = 412 \text{ nm}$ ).

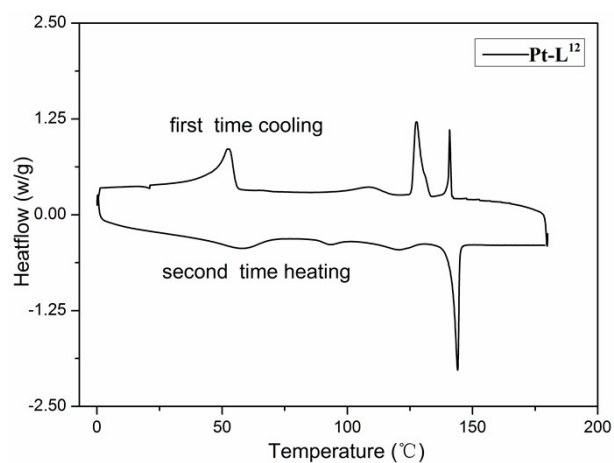

**Fig. S6** DSC heating and cooling curves of **Pt-L<sup>12</sup>**.

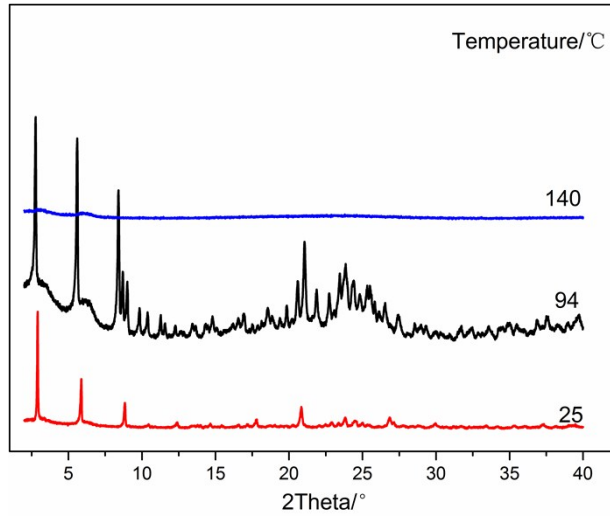

Fig. S7 Variable-temperature XRD patterns of Pt-L<sup>16</sup> on heating process.

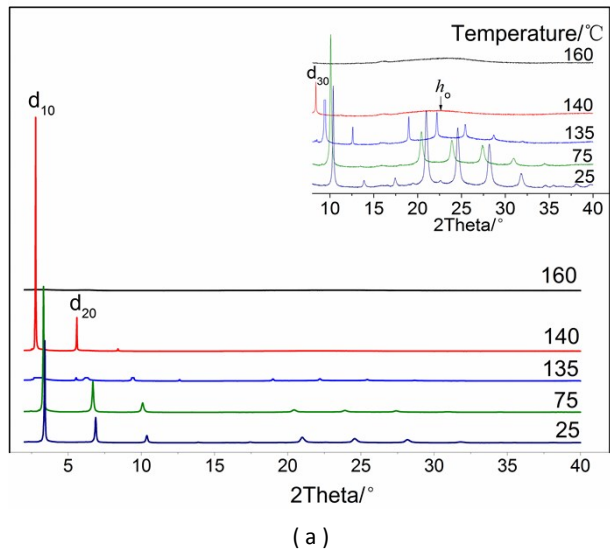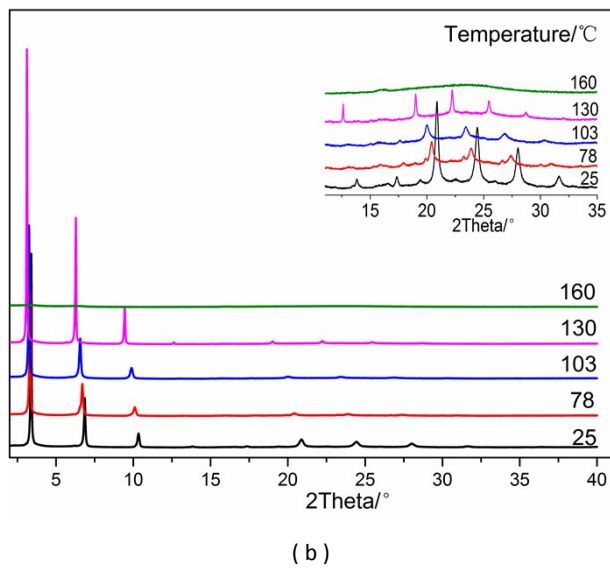

Fig. S8 Variable-temperature XRD patterns of Pt-L<sup>12</sup> on cooling process ( a ) and heating process ( b ). Inset shows

the magnified XRD patterns at high-angle regions.

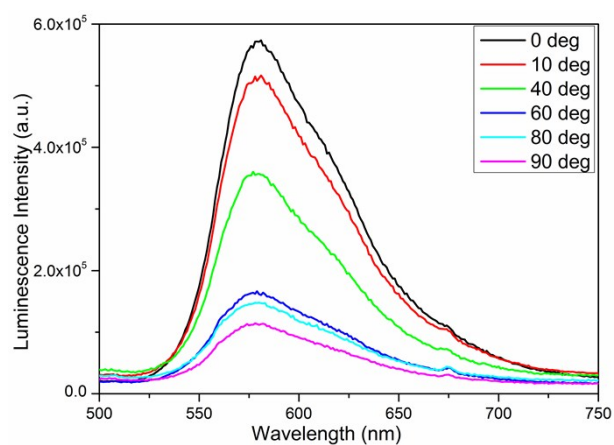

Fig. S9 PL spectra of the aligned Pt-L<sup>16</sup> at different degrees of polarization.

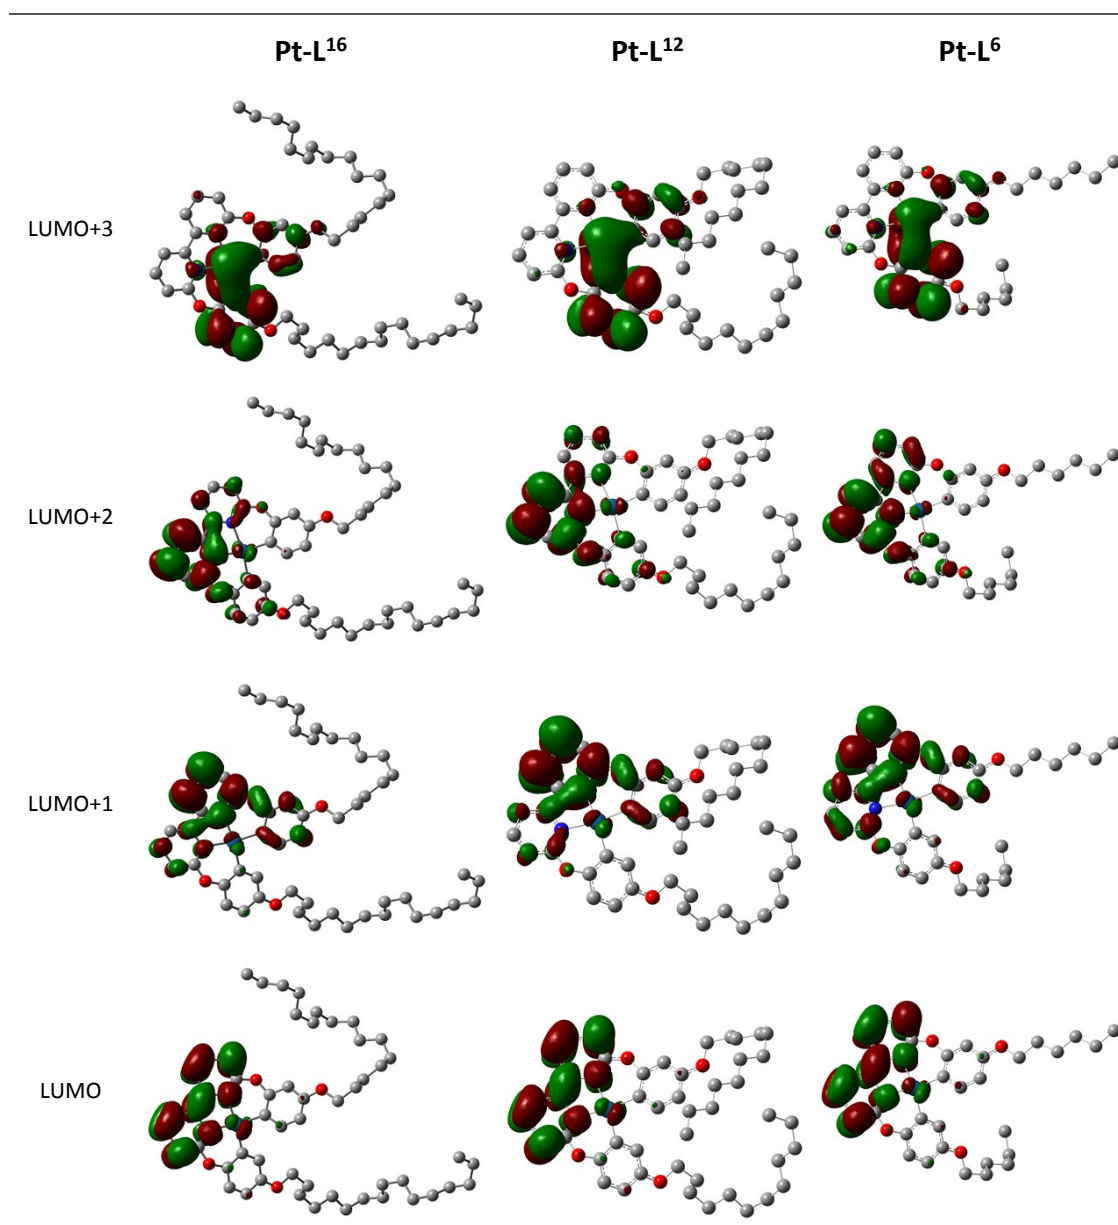



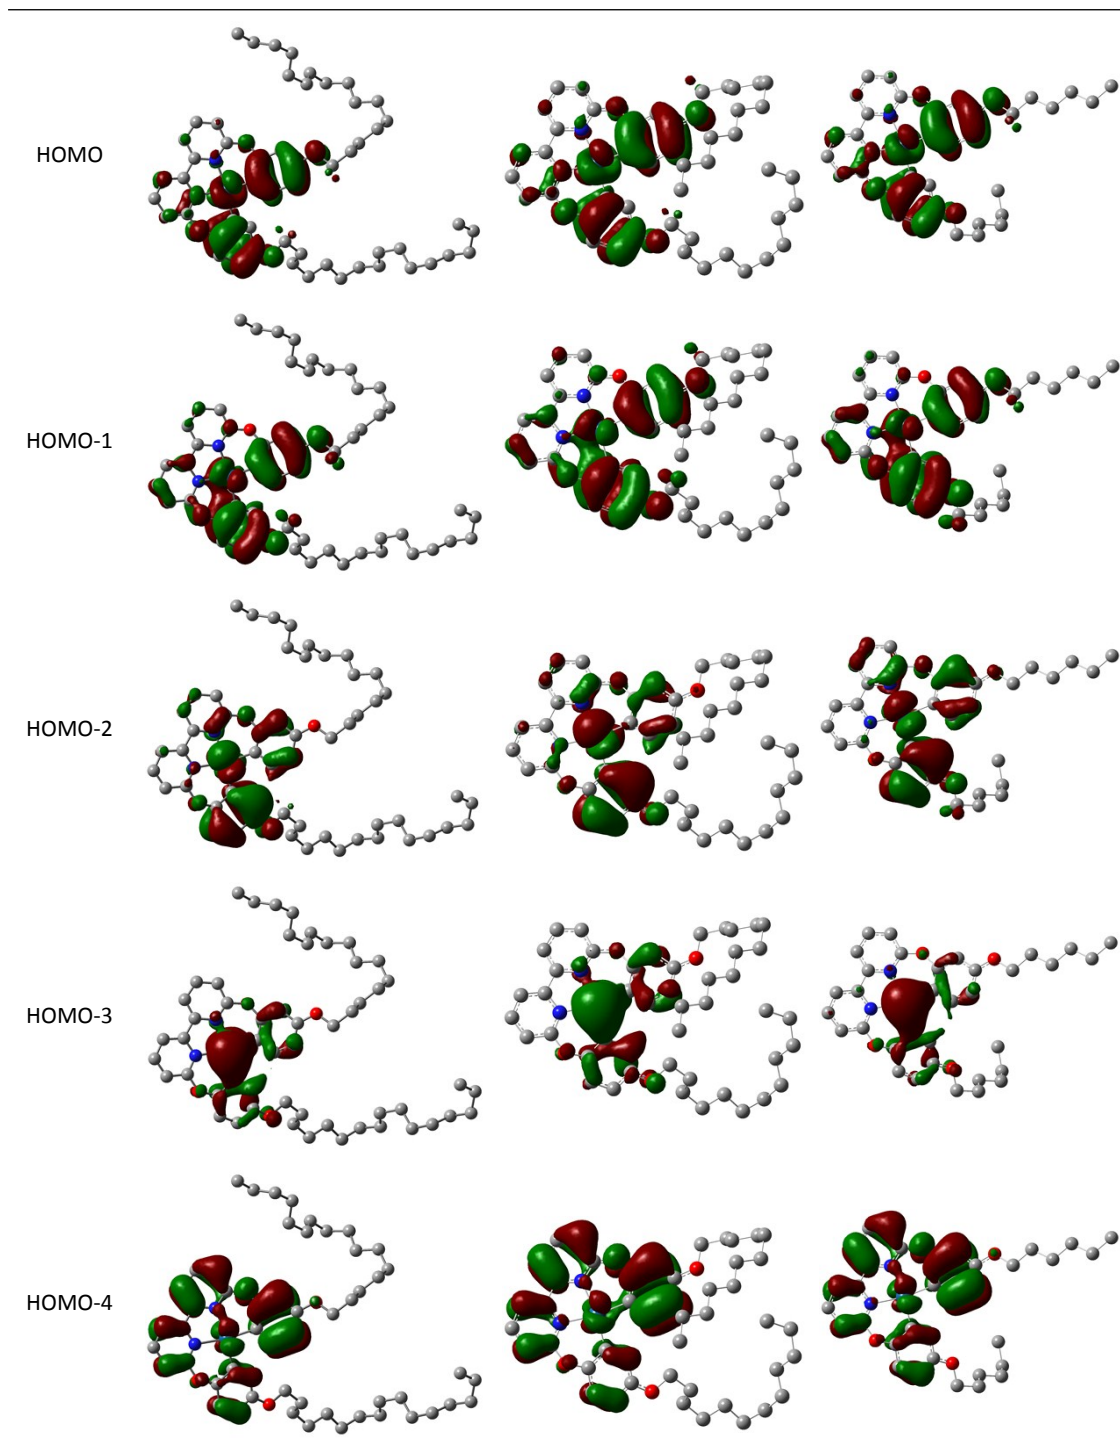

Fig. S10 Representative frontier orbitals for Pt-L<sup>16</sup>, Pt-L<sup>12</sup> and Pt-L<sup>6</sup>.

$^1\text{H}$  NMR plot of **Pt-L<sup>6</sup>**.

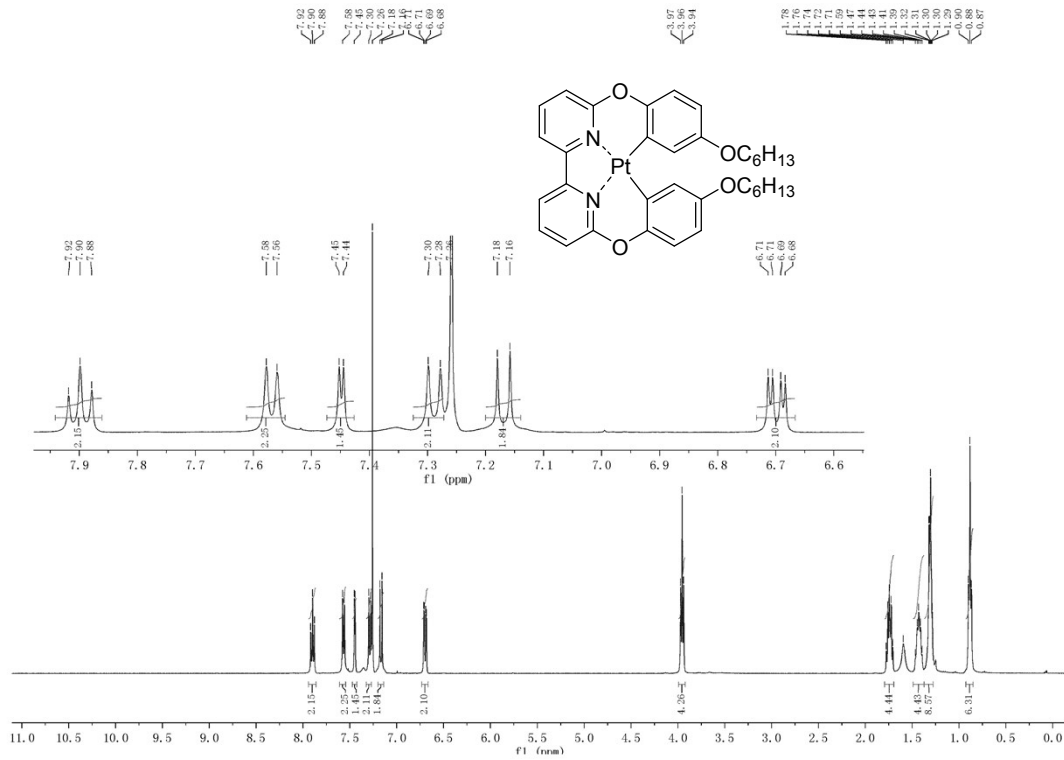

$^1\text{H}$  NMR plot of **Pt-L<sup>12</sup>**.

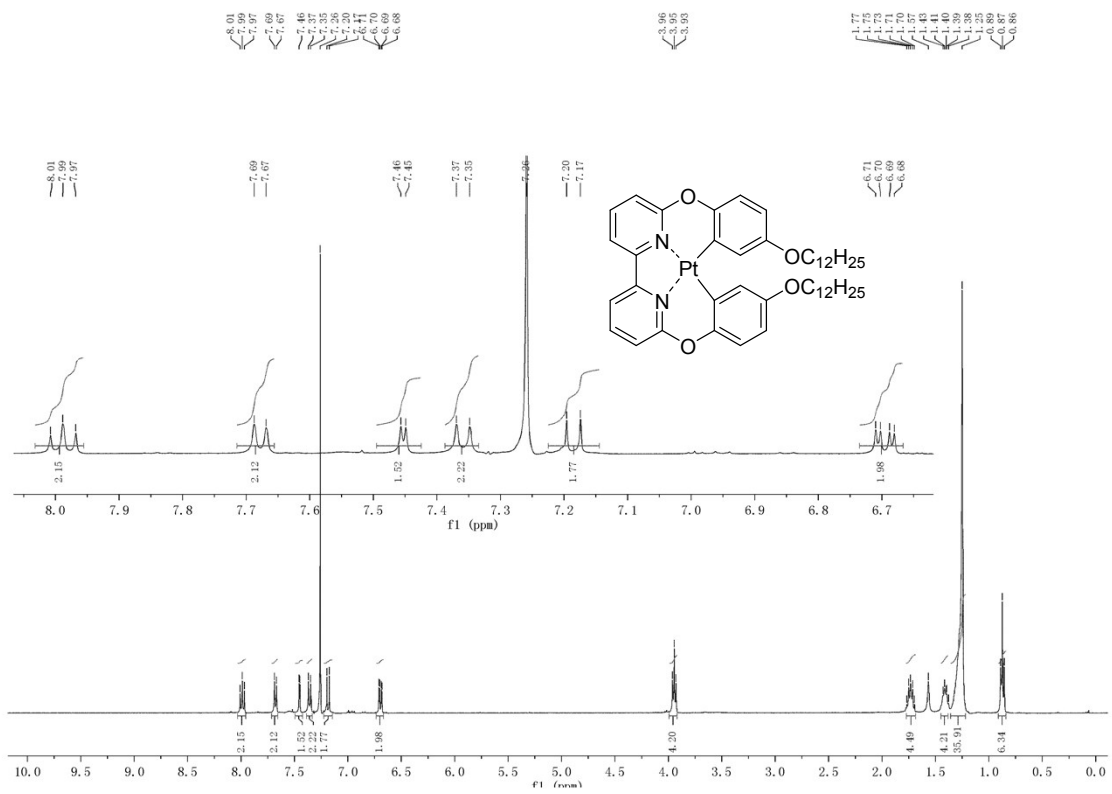

# $^1\text{H}$ NMR plot of Pt-L<sup>16</sup>.

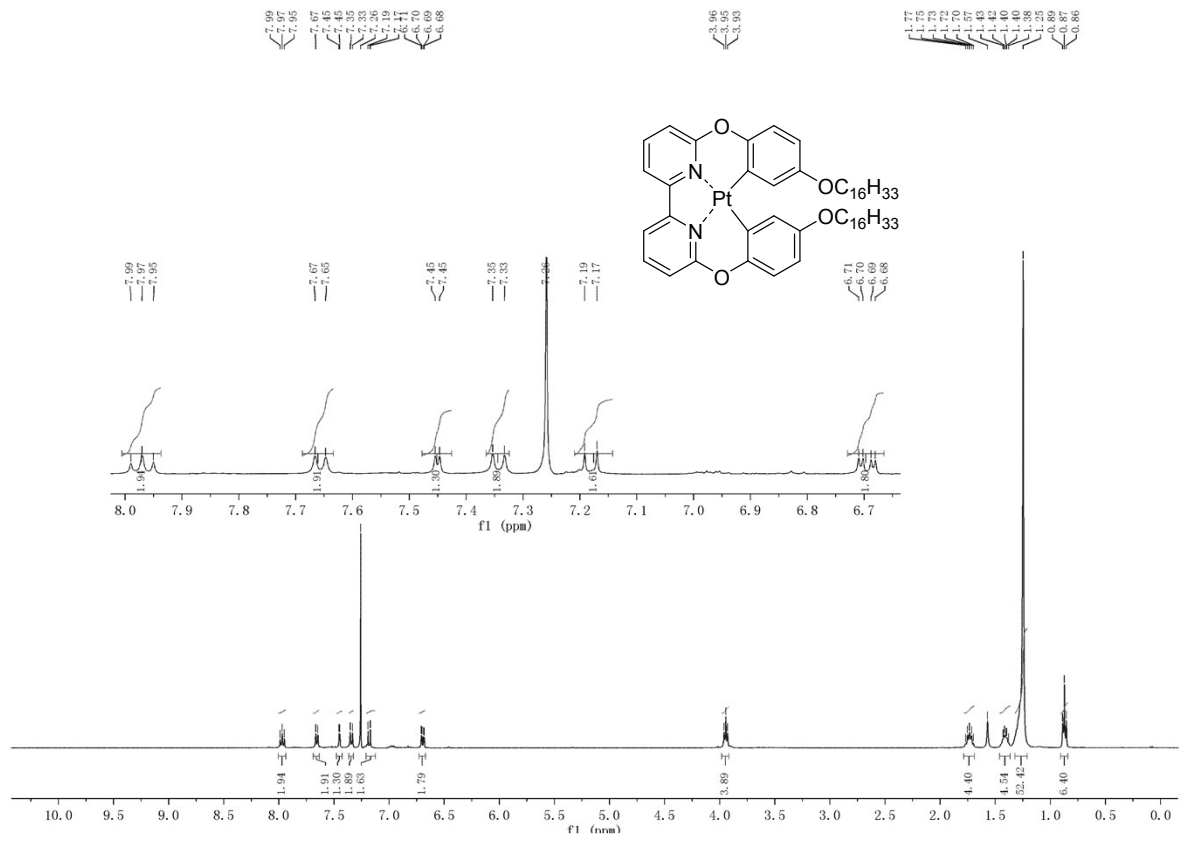

# $^{13}\text{C}$ NMR plot of Pt-L<sup>6</sup>.

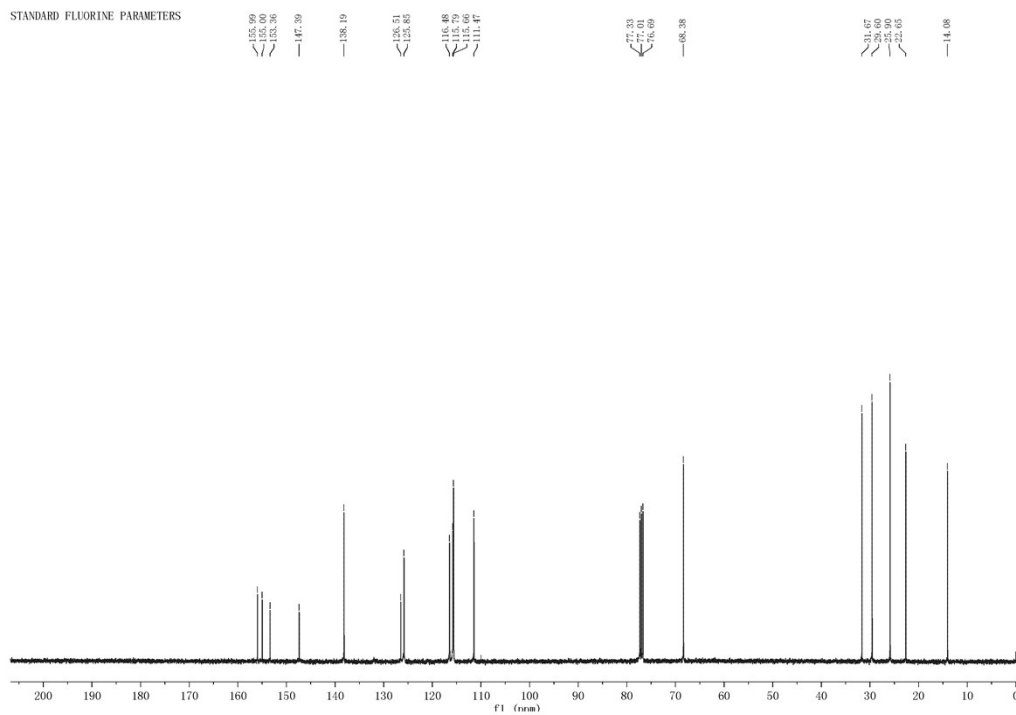

# $^{13}\text{C}$ NMR plot of Pt-L<sup>12</sup>.

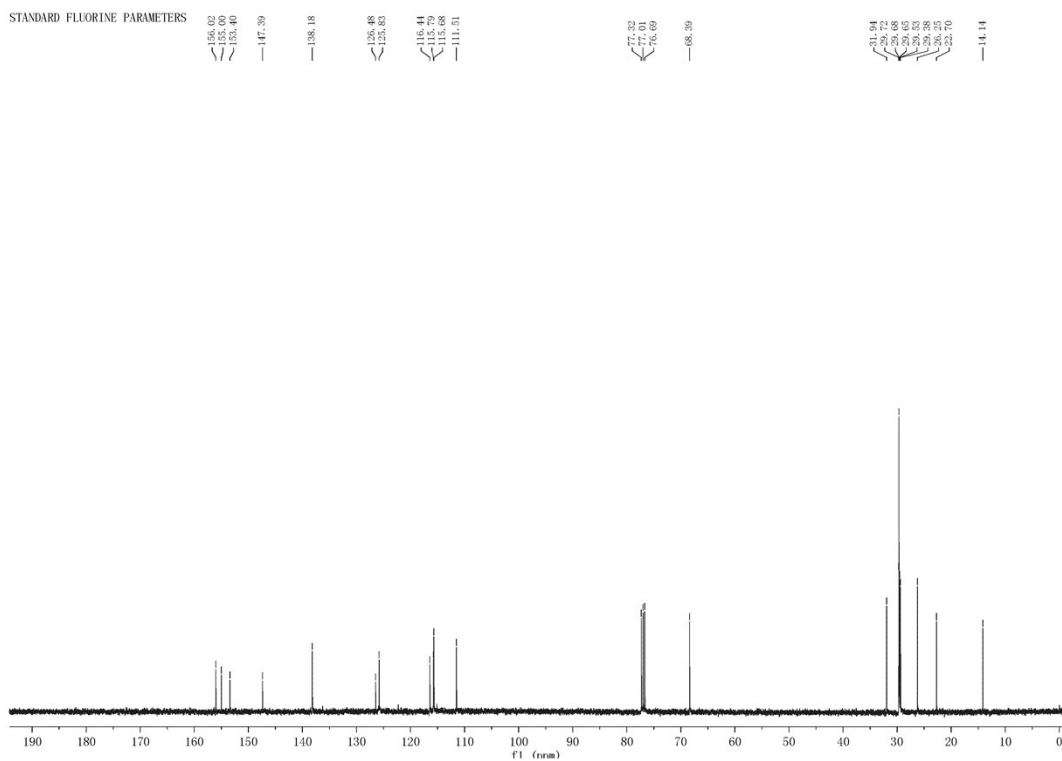

### MS plot of Pt-L<sup>6</sup>.

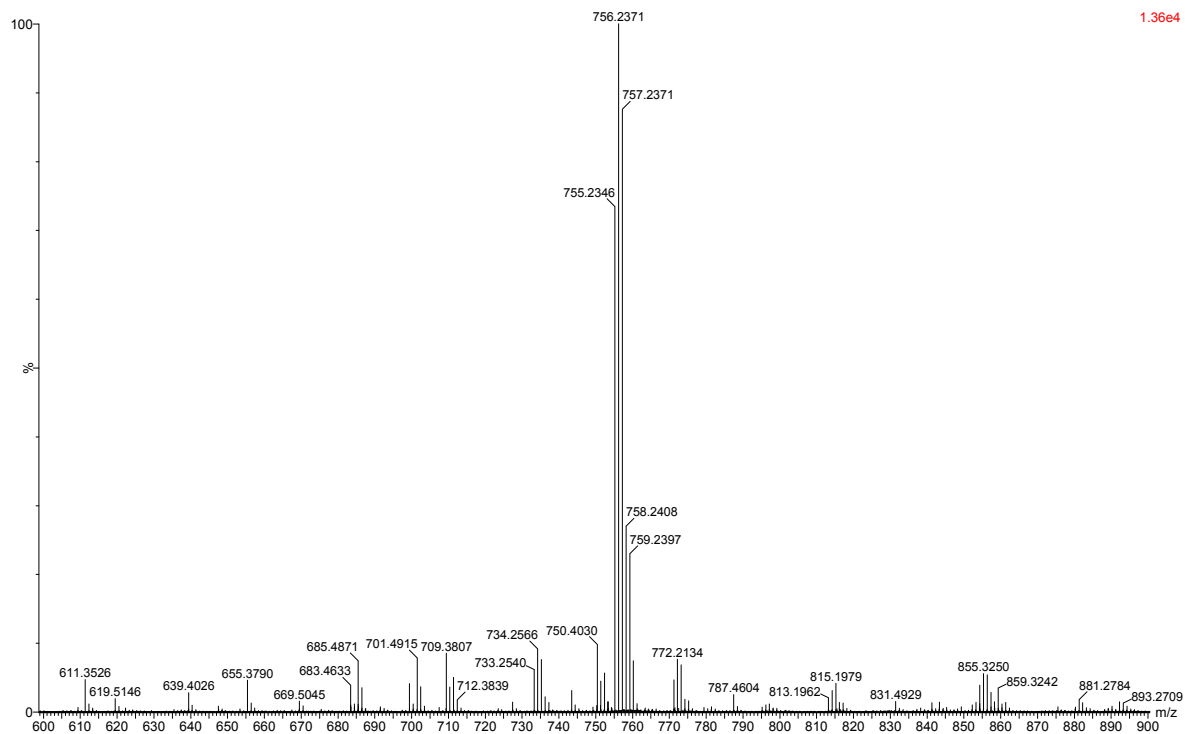

### MS plot of Pt-L<sup>12</sup>.

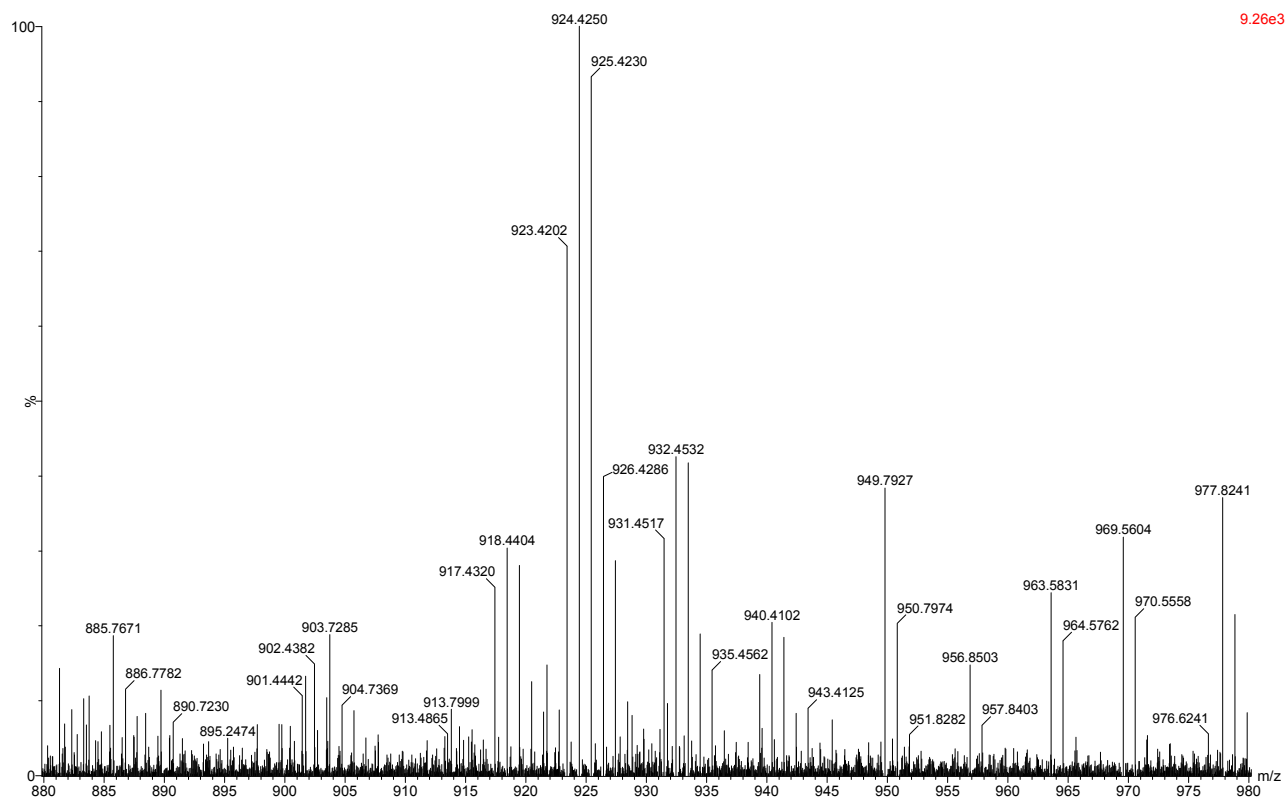

# MS plot of Pt-L<sup>16</sup>.

3.20e3

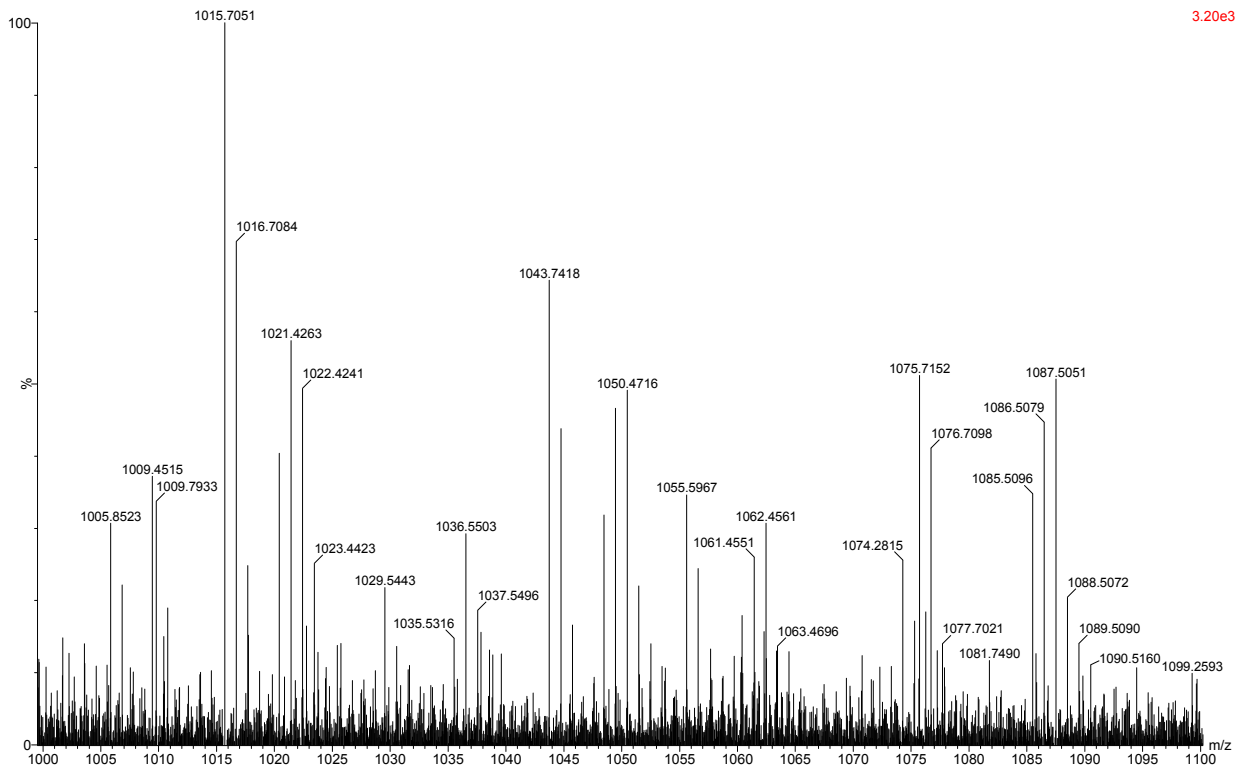

Supplement: c6dt04502b1.pdf [file c6dt04502b1.pdf]
